# Supplementary material for: An extremely low temperature environment operatable hybrid dual-functioning energy device driven by a supercapacitor/piezo–triboelectric generator system
Source: Royal Society of Chemistry journal article supplement (doi:10.1039/d3ta03104g), 2023-01-01
Supplement: d3ta03104g5.pdf [file d3ta03104g5.pdf]

Electronic Supplementary Material (ESI).  
This journal is © The Royal Society of Chemistry

RSCPublishing

## Electronic Supplementary Information

### Extreme Low Temperature Environment Operatable Hybrid Dual-Functioning Energy Device Driven from Supercapacitor/Piezo-Tribo Electric Generator System

Samayanan Selvam<sup>a,†</sup>, Young-Kwon Park<sup>b,†</sup>, Jin-Heong Yim<sup>a,\*</sup>

<sup>a</sup>Division of Advanced Materials Engineering, Kongju National University, Budaedong 275, Seobuk-gu, Cheonan-si, Chungnam 31080, South Korea

<sup>b</sup>School of Environmental Engineering, University of Seoul, Seoul, 02504 Korea

E-mail: [jhyim@kongju.ac.kr](mailto:jhyim@kongju.ac.kr);

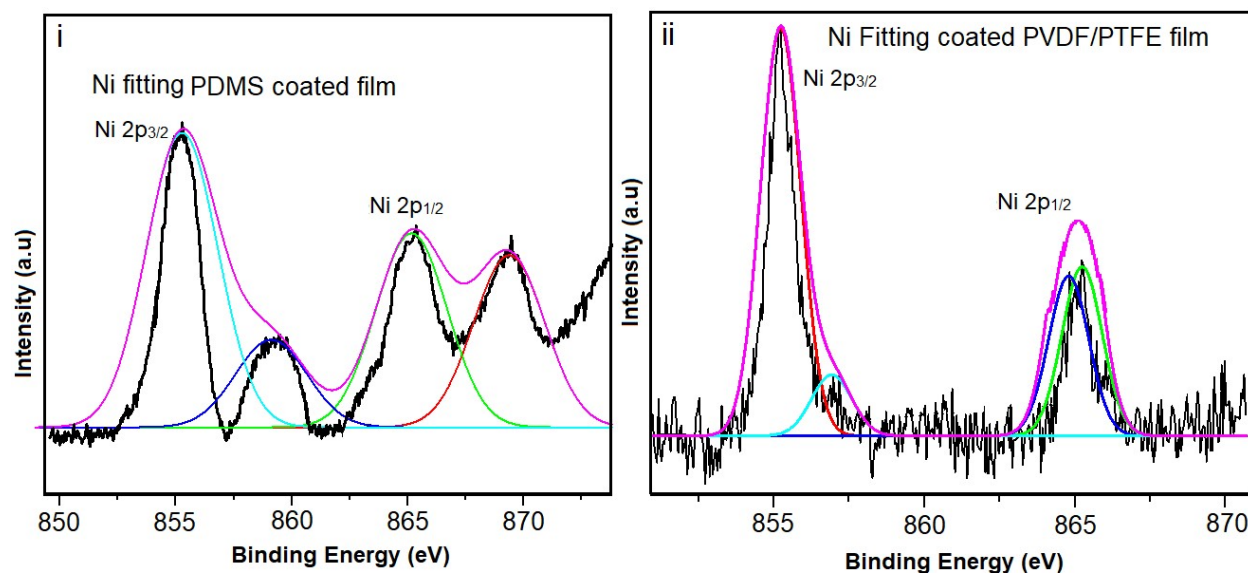

ESI. Fig. 1. (i and ii ) Ni XPS fitting details of PDMS and PVDF-PTFE coated composite

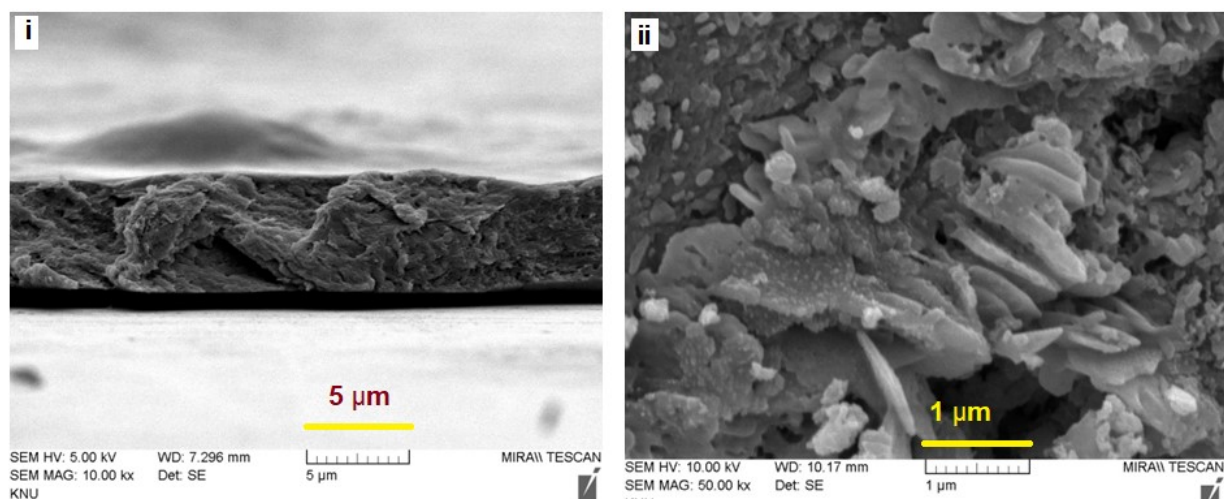

ESI. Fig. 2. (i and ii ) SEM images of Cross section images of PEDOT:TREN:Ni@MnCO<sub>3</sub> composite

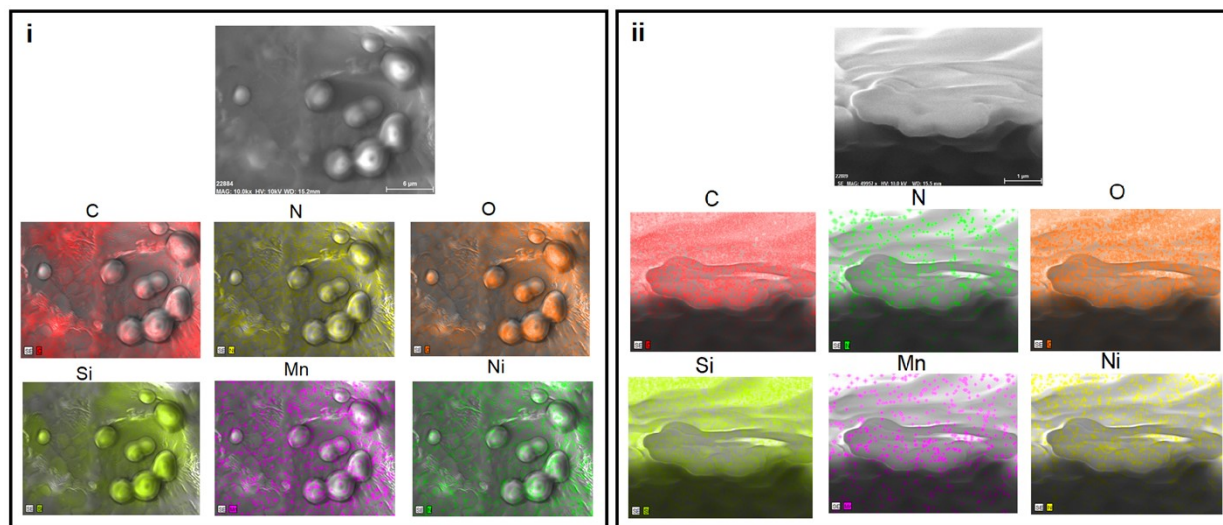

ESI Fig. 3. EDS mapping of PEDOT:TREN:Ni@MnCO<sub>3</sub>/PDMS Composite Surface (i) and Cross section (ii)

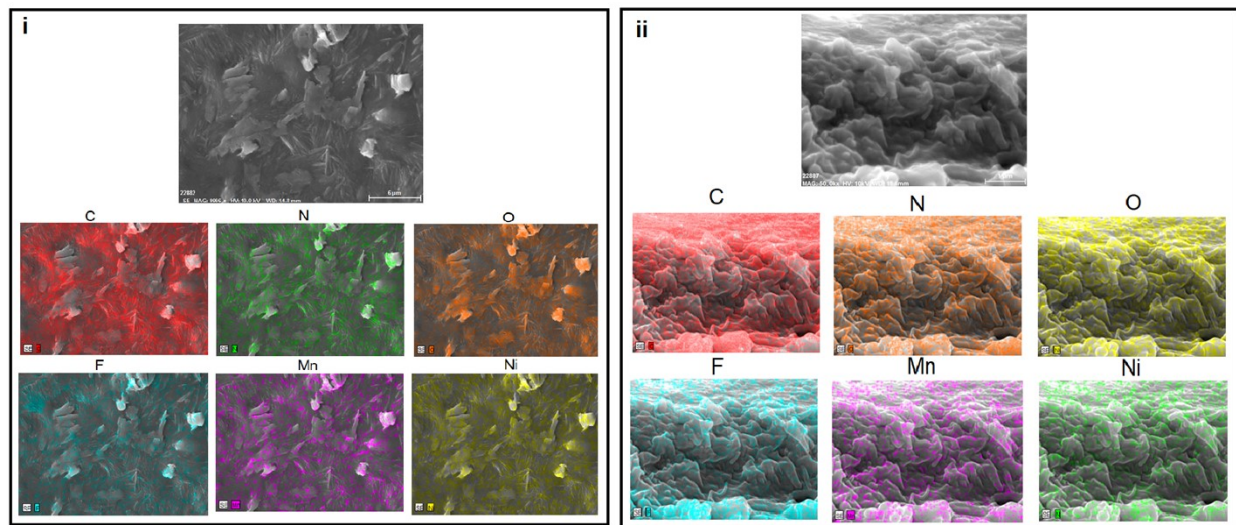

ESI Fig. 4 EDS mapping of PEDOT:TREN:Ni@MnCO<sub>3</sub>/PVDF-PTFE Surface (i) and Cross section (ii)

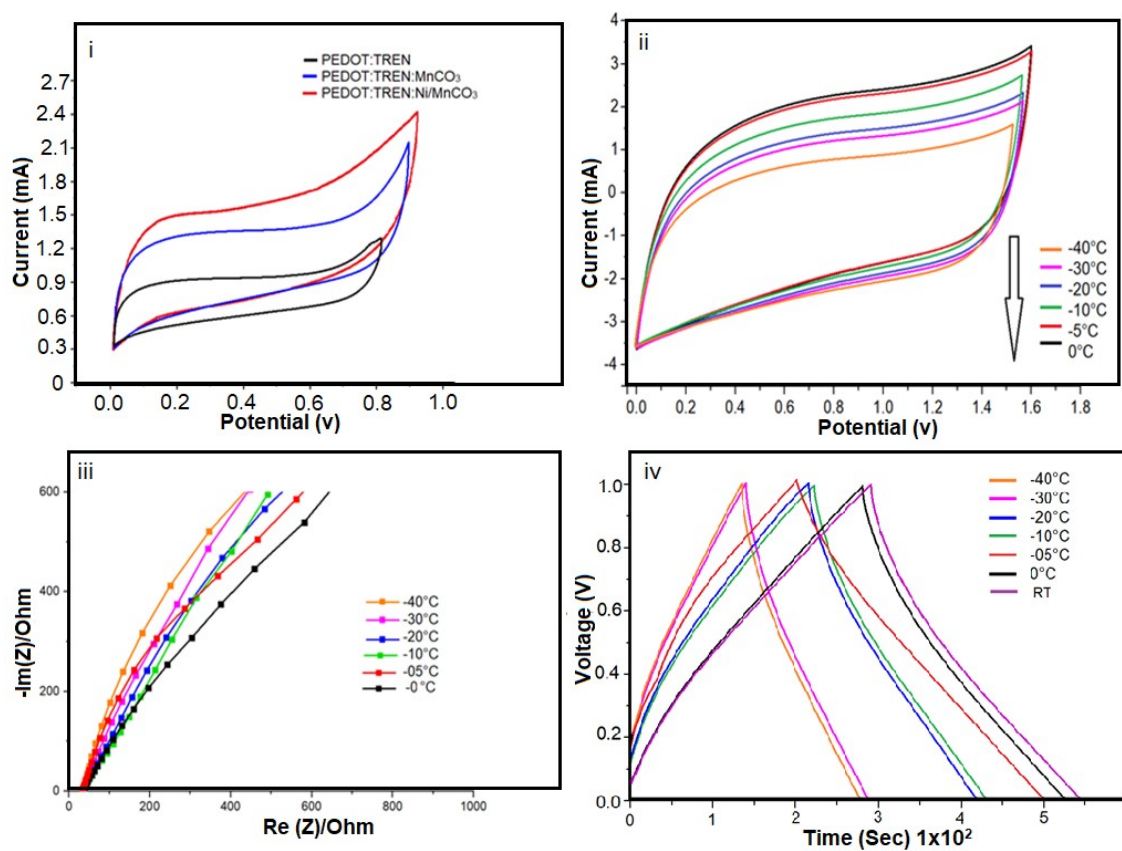

ESI Fig. 5 CV profile of PEDOT:TREN, PEDOT:TREN:MnCO<sub>3</sub> and PEDOT:TREN, PEDOT:TREN:Ni/MnCO<sub>3</sub> composite without GO (i), CV details at various current rate (ii) and EIS studies (iii) and (iv) Charge-discharge curves.

## Calculations

The Gravimetric specific capacitance was calculated from the galvanostatic discharge curves, using the following equation 1.

$$C = \frac{I\Delta t}{m\Delta V} \text{ .....1}$$

Also, the aerial capacitance was calculated from equation 2

$$C = \frac{I\Delta t}{A\Delta V} \text{ .....2}$$

Where (I) is charge or discharge current,  $\Delta t$  (s) is the time for a full charge or discharge,  $m$  (g) designates the mass of the active material, A is the area of the active materials and  $\Delta V$  signifies the voltage change after a full charge or discharge.

The energy density (E) considered by equation 3 .

$$E = \frac{C(\Delta V)^2}{2} \text{ WhKg}^{-1} \text{ .....3}$$

Where C is the specific capacitance of the active materials, and  $\Delta V$  is the potential window of discharge.<sup>1-5</sup>

EIS. Table 1. Specific capacitance calculation details of PEDOT:TREN:Ni@MnCO<sub>3</sub>

| Temp. | Gravimetric Cap. |
|-------|------------------|
|       | Fg <sup>-1</sup> |
| -40°C | 275              |
| -30°C | 283              |
| -20°C | 350              |
| -10°C | 426              |
| -05°C | 504              |
| 0°C   | 491              |
| RT    | 475              |

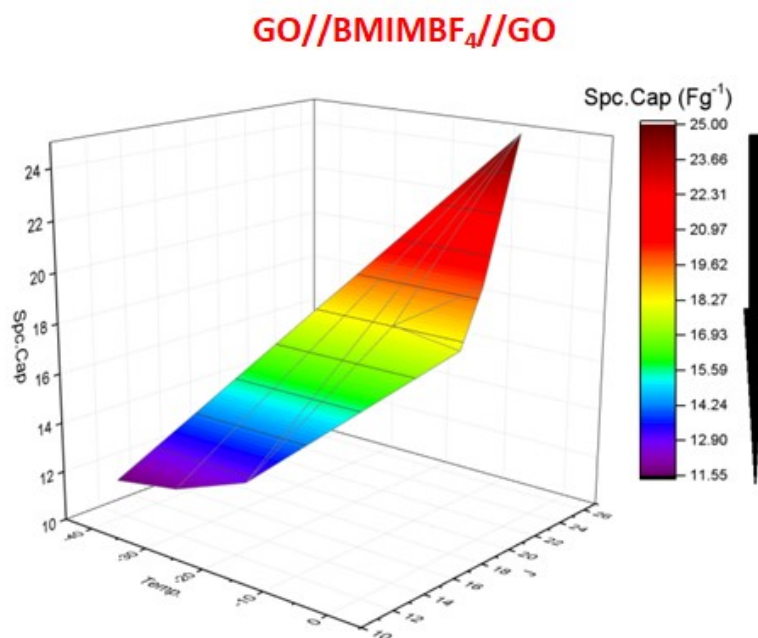

ESI. Fig 6 Electrolyte performance at low temperature conditions in terms of Specific capacitance and calculation details

EIS. Table 2. Specific capacitance calculation details of Electrolyte performance

| Temp. | Gravimetric Cap. |
|-------|------------------|
|       | Fg <sup>-1</sup> |
| -40°C | 11.6             |
| -30°C | 11.9             |
| -20°C | 12.7             |
| -10°C | 18.3             |
| -05°C | 25               |
| 0°C   | 20               |
| RT    | 18               |

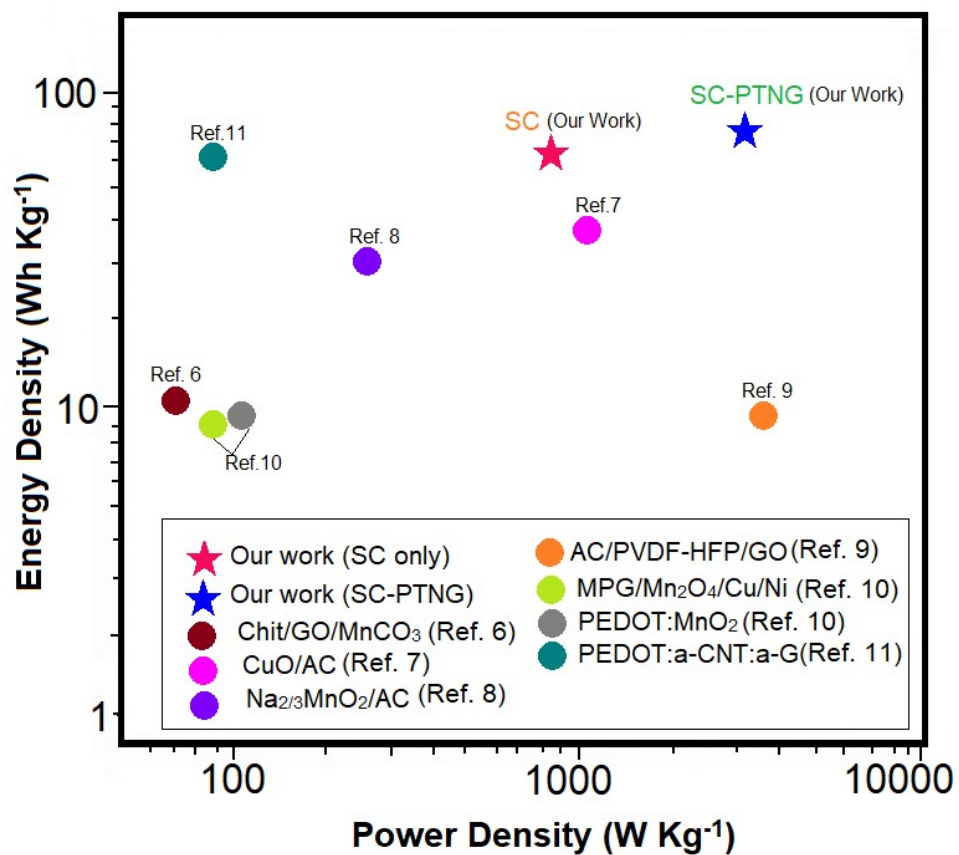

ESI. Fig 7. Energy density and Power density comparison from Ragone plot from reports on MnCO<sub>3</sub>, Ni, PEDOT related Asymmetric supercapacitors (ASC)



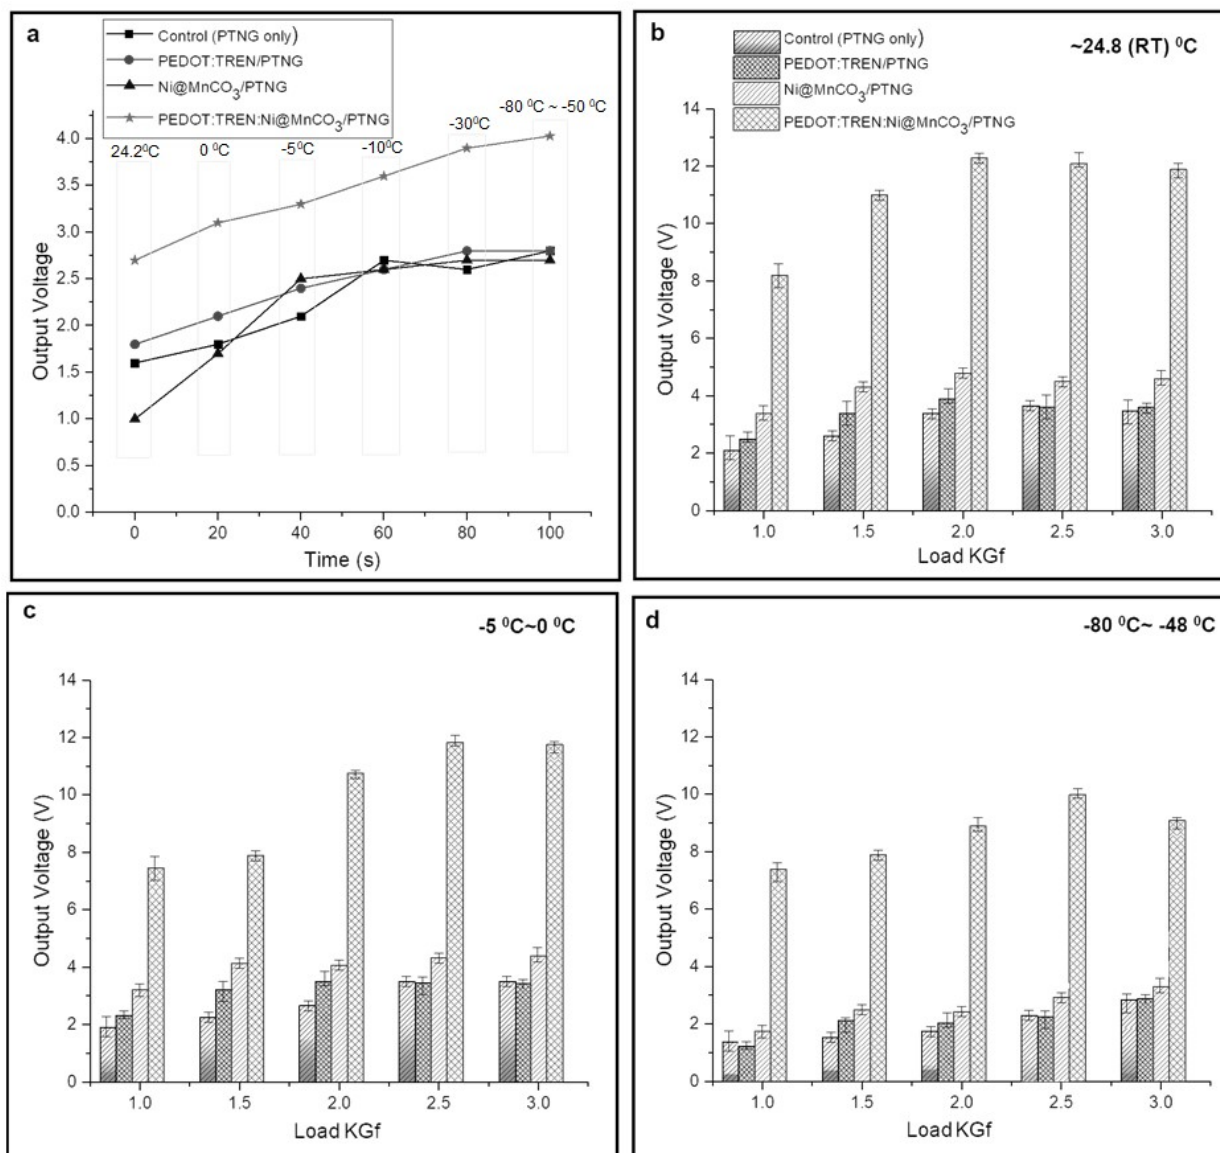

ESI. Fig 8. Control experiment PTNG performance test under bending and twist conditions at after 1000 cycles workout; (a); output voltage error bar diagram of PTNG performance test under various load condition and temperature ranges (b-d) respectively.

ESI. Table 3. Comparative analysis of similar SC-PTNG from the literature.

| Self-powered supercapacitor (SC-PTNG)                                            | System                 | Electrolyte                              | Temp. (°C) | Specific capacitance     | Charging Volt/ Output Volt) | Ref          |
|----------------------------------------------------------------------------------|------------------------|------------------------------------------|------------|--------------------------|-----------------------------|--------------|
| PEDOT:TREN:PDMS:Ni@MnCO <sub>3</sub> / PEDOT:TREN:PVDF-PTFE:Ni@MnCO <sub>3</sub> | SC- Piezo-Tribo hybrid | [BMIM][BF <sub>4</sub> ]                 | RT         | 542 Fg <sup>-1</sup>     | 22 V                        | Our work     |
| PEDOT:TREN:PDMS:Ni@MnCO <sub>3</sub> / PEDOT:TREN:PVDF-PTFE:Ni@MnCO <sub>3</sub> | SC- Piezo-Tribo hybrid | [BMIM][BF <sub>4</sub> ]                 | -80        | 317 Fg <sup>-1</sup>     | 11.9 V                      | Our work     |
| AgNWS/NiOH/ P(VDF-TrFE)                                                          | SC- Piezo-Tribo hybrid | (PVA/KOH                                 | RT         | 3.47 mFcm <sup>-2</sup>  | 150 V                       | ESI. Ref. 12 |
| Siloxene–PVDF piezofiber                                                         | SC- Piezo- separately  | TEABF <sub>4</sub>                       | RT         | 27.58 mFcm <sup>-2</sup> | 207 mV                      | ESI. Ref. 13 |
| Co-Fe <sub>2</sub> O <sub>3</sub> @ACC                                           | SC- Piezo- separately  | PVA-KCl- BaTiO <sub>3</sub>              | RT         | 2.8 mFcm <sup>-2</sup>   | 120 mV                      | ESI. Ref. 14 |
| 3D AG/PTFE/PDMS                                                                  | SC-Tribo separately    | NA                                       | RT         | 550 Fg <sup>-1</sup>     | 3.2V                        | ESI. Ref. 15 |
| Silicone-CF fiber                                                                | SC-Tribo separately    | H <sub>3</sub> PO <sub>4</sub> / PVA gel | RT         | 31.25Fg <sup>-1</sup>    | 42.9 V                      | ESI. Ref. 16 |

#### ESI. References

1. N. F. M. Yusof, N. H. Idris, M. F. Din, S. R. Majid, N. Harun, M. M. Rahman, (2020) 10:9207 | <https://doi.org/10.1038/s41598-020-66148-w>
2. M. Manoj, D. Mangalaraj, N. Ponpandian and C. Viswanathan, RSC Adv., 2015, 5, 48705-48711
3. Z. Yang, Y. Jiang, L. X. Yu, B. Wen, F. Li, S. Sun and T. Hou, J. Mater. Chem., 2005, 15, 1807–1811
4. S. Selvam, B. Balamuralitharan, S.N. Karthick, K.V.Hemalatha, K. Prabakar and Hee-Je Kim, Anal. Methods, 2016, 8, 7937-7943.
5. H. Chen, Z. Yan, X.Y. Liu, X. L. Guo, Y. X. Zhang, Z. H. Liu, Rational design of microsphere and microcube MnCO<sub>3</sub>@MnO<sub>2</sub> heterostructures for supercapacitor electrodes, Journal of Power Sources 353 (2017) 202-209
6. S. Selvam, J.-H. Yim, J. Energy Storage, 2021, 43, 103300
7. A. K. Mishra, A. K. Nayak, A. K. das, D. Pradhan, J. Phys. Chem. C 2018, 122, 11249
8. A. A. Nechikott, P. K. Nayak, RSC Adv., 2023, 13, 14139
9. X. Yang, F. Zhang, L. Zhang, T. Zhang, Y. Huang and Y. Chen, Adv. Funct. Mater., 2013, 23, 3353–3360.
10. W. Li, X. Xu, C. Liu, M. C. Tekell, J. Ning, J. Guo, J. Zhang, D. Gan, Adv. Funct. Mater. 2017, 27, 1702738
11. Y. Zhou, N. Lachman, M. Ghaffari, H. Xu, D. Bhattacharya, P. Fattahi, M. R. Abidian, S. Wu, K. K. Gleason, B. L. Ward;e. Q. M. Zhang, J. Mater. Chem. A, 2014, 2, 9964
12. S. Qin, Q. Zhabg, X. Yang, M. Liu, Q. Sun, Z. L. Wang, Adv. Energy Mater. 2018, 8, 1800069



13. K. Krishnamoorthy, P. Pazhamalai, V. K. Mariappan, S. S. Nardekar, S. Sahoo, S.-J. Kim, . Nat Commun 11, 2351 (2020).  
<https://doi.org/10.1038/s41467-020-15808-6>
14. D. Zhou, F. Wang, J. Yang, L, -Z, Fan, Chemical Engineering Journal, 2021, 406, 126825
15. J. Dong, S. Huang, J. Luo, J. Zhao, F. R. Fan, Z. -Q. Tian, Jung, Nano Energy, 2022, 95, 106971
16. Y. Yang, L. Xie, Z. Wen, C. Chen, X. Chen, A. Wei, P. Cheng, X. Xie, X. Sun, ACS Appl. Mater. Interfaces 2018, 10, 42356
