# Supplementary material for: An extremely low temperature environment operatable hybrid dual-functioning energy device driven by a supercapacitor/piezo–triboelectric generator system
Source: Royal Society of Chemistry journal article supplement (doi:10.1039/d3ta03104g), 2023-01-01
Supplement: d3ta03104g8.pdf [file d3ta03104g8.pdf]

### Nomenclature and Subscripts

|                                                               |                                                      |
|---------------------------------------------------------------|------------------------------------------------------|
| SCs                                                           | supercapacitors                                      |
| Fg <sup>-1</sup>                                              | Faraday per gram                                     |
| PTNGs                                                         | Piezo-triboelectric nanogenerators                   |
| PEDOT                                                         | Poly3,4-ethylenedioxythiophene                       |
| TREN                                                          | Tris(2-aminoethyl)amine                              |
| PDMS                                                          | Polydimethylsiloxane                                 |
| PVDF-PTFE                                                     | Polyvinylidene fluoride- poly tetra fluoro ethylene  |
| KMnO <sub>4</sub>                                             | Potassium permanganate                               |
| (NH <sub>4</sub> ) <sub>2</sub> S <sub>2</sub> O <sub>8</sub> | Ammonium persulfate                                  |
| Ni@MnCO <sub>3</sub>                                          | Nickel@manganese carbonates                          |
| BMIMBF <sub>4</sub>                                           | 1-Butyl-3-methyl imidazolium tetrafluoroborate       |
| DMF                                                           | N, N-dimethylformamide                               |
| PET                                                           | Polyethylene terephthalate                           |
| KG <sub>f</sub>                                               | Load Capacity                                        |
| UTM                                                           | Universal Testing Machine (materials stress testing) |
| R <sub>s</sub>                                                | Sheet resistance or bulk resistance                  |
| R <sub>ct</sub>                                               | Charge transfer resistance                           |
| W <sub>R</sub>                                                | Warburg element resistance                           |
| C <sub>dl</sub>                                               | Double layer capacitance                             |
| ITO                                                           | Indium tin oxide                                     |
| CNT                                                           | Carbon nanotube                                      |
| PVA                                                           | Poly(vinyl alcohol)                                  |
| XPS                                                           | X-ray photoelectron spectroscopy                     |
| EDS                                                           | Energy-dispersive X-ray spectroscopy                 |
| CV                                                            | Cyclic voltammetry                                   |
| EIS                                                           | Electrochemical impedance spectroscopy               |
| GCD                                                           | Galvanostatic charge-discharge                       |
| IL                                                            | Ionic liquid                                         |
| EG                                                            | Ethylene glycol                                      |
| LiCl                                                          | Lithium chloride                                     |
